# Supplementary material for: Chicken-derived RSPO1 and WNT3 contribute to maintaining longevity of chicken intestinal organoid cultures
Source: PubMed Central journal article supplement (PMC9217957; doi:10.1038/s41598-022-14875-7), 2022-06-22
Supplement: 41598_2022_14875_MOESM1_ESM.pdf [file 41598_2022_14875_MOESM1_ESM.pdf]

## Supplementary files

**Table 1. Medium and reagents**

Overview of all the reagents in Basic culture medium, Intermediate culture medium, Mouse organoid culture medium and Chicken organoid culture medium.

| Reagent                   | Basic culture medium (BCM) | Intermediate culture medium (ICM) | Mouse organoid culture medium (MOCM) | Chicken organoid culture medium (COCM) |
|---------------------------|----------------------------|-----------------------------------|--------------------------------------|----------------------------------------|
| DMEM/F12                  | 100%                       | 100%                              | 100%                                 | 100%                                   |
| 10% FCS                   | 10%                        | 10%                               | 10%                                  | 10%                                    |
| Glutamax                  | 1%                         | 1%                                | 1%                                   | 1%                                     |
| sodium pyruvate           | 1mM                        | 1mM                               | 1mM                                  | 1mM                                    |
| Non-Essential Amino Acids | 1mM                        | 1mM                               | 1mM                                  | 1mM                                    |
| Penicillin-streptomycin   | 10,000 U/mL                | 10,000 U/mL                       | 10,000 U/mL                          | 10,000 U/mL                            |
| CHIRR99021                |                            | 4.3 $\mu$ M                       | 4.3 $\mu$ M                          | 4.3 $\mu$ M                            |
| Y27632                    |                            | 10 $\mu$ M                        | 10 $\mu$ M                           | 10 $\mu$ M                             |
| Valproic acid             |                            | 0.78 mM                           | 0.78 mM                              | 0.78 mM                                |
| DMH-1                     |                            | 1.3 $\mu$ M                       | 1.3 $\mu$ M                          | 1.3 $\mu$ M                            |
| Mouse-specific Wnt3a      |                            |                                   | 1:10                                 |                                        |
| Mouse-specific Rspo1      |                            |                                   | 1:10                                 |                                        |
| FOXO1-inhibitor AS1842856 |                            |                                   |                                      | 0.2 $\mu$ M                            |
| Prostaglandin E2          |                            |                                   |                                      | 7.09 $\mu$ M                           |
| Chicken-specific WNT3     |                            |                                   |                                      | 1:5                                    |
| Chicken-specific RSPO1    |                            |                                   |                                      | 1:5                                    |

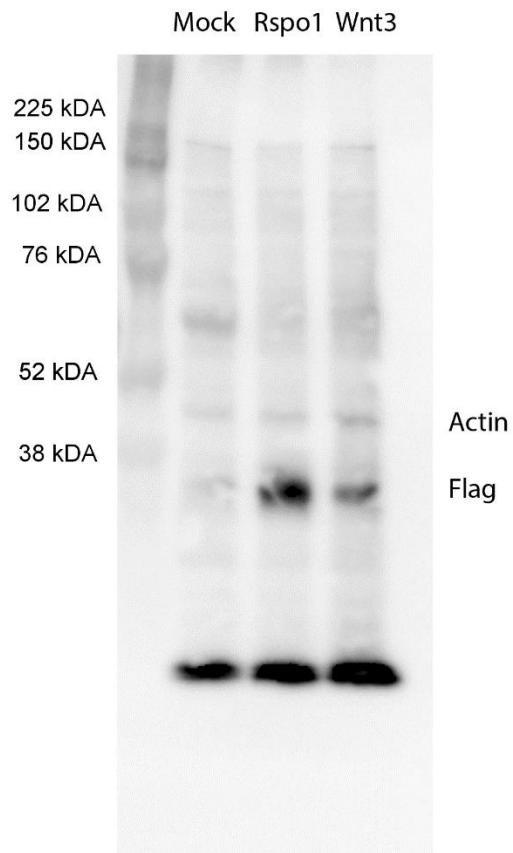

**Supplementary figure 1. Immunoblot of chicken RSPO1 and chicken WNT3 protein expression in transfected HEK293T cells.**

Actin was used as the protein loading control and anti-flag HRP was used to visualize RSPO1 and WNT3.

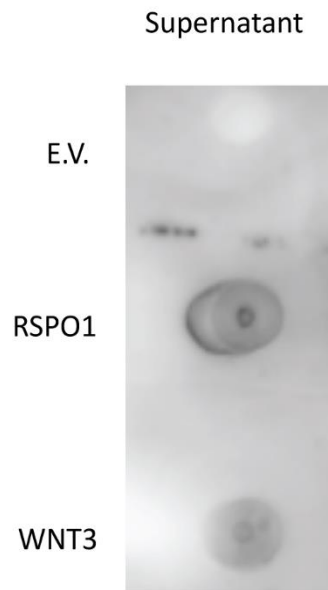

**Supplementary figure 2. Dot-blot of chicken RSPO1 and chicken WNT3 protein expression in supernatant of transfected Hek293t cells.**

Empty vector (E.V.), chicken RSPO1 and chicken WNT3 are detected by anti-flag-HRP.

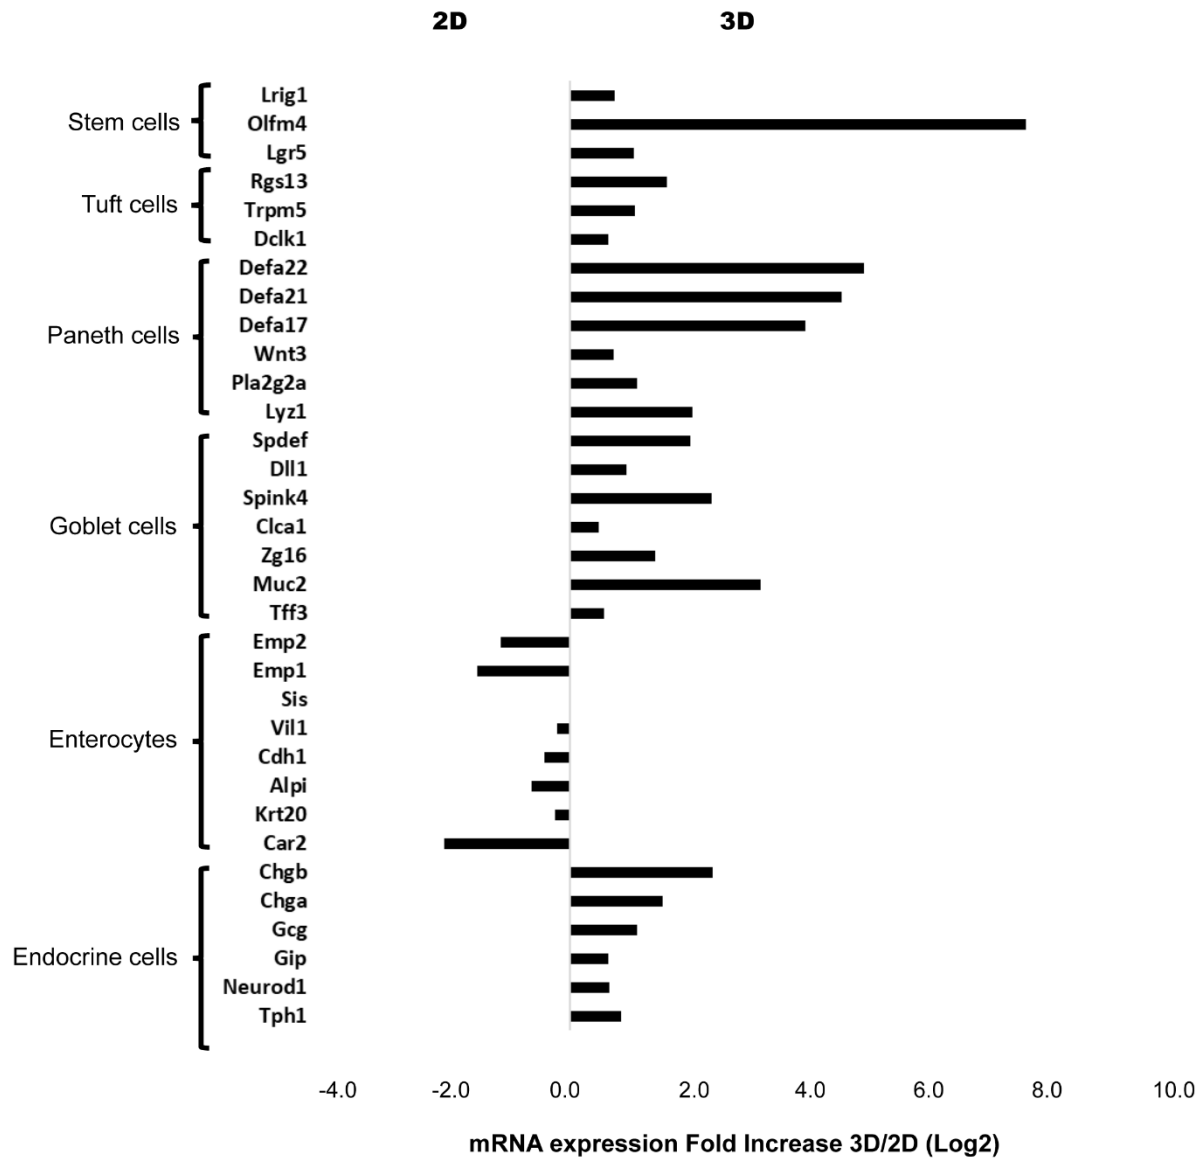

**Supplementary figure 3.** mRNA expression of cell-specific genes expressed in 2D and 3D mouse intestinal organoids.

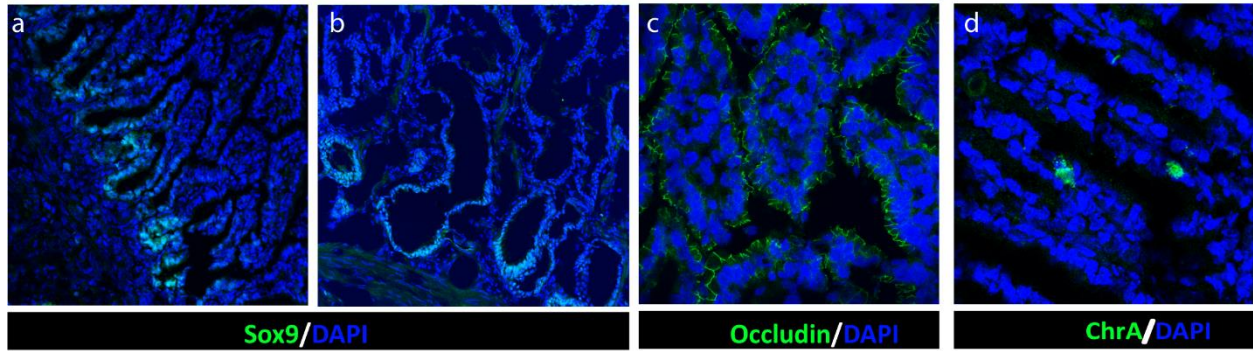

**Supplementary figure 4. Confirming functionality of antibodies in chicken tissue.**

Immunohistochemistry images of embryonic intestinal tissues stained with antibodies mentioned in Table 1. **(a)** Progenitor cells are visualized with anti-Sox9 in embryonic tissue (magnification 20 x) **(b)** and in adult intestinal tissue **(c)** Tight junctions are visualized with anti-occludin (magnification 63 x) **(d)** Enteroendocrine cells are visualized by anti-chromogranin A. Nuclei are stained with DAPI (blue) (magnification 63x )

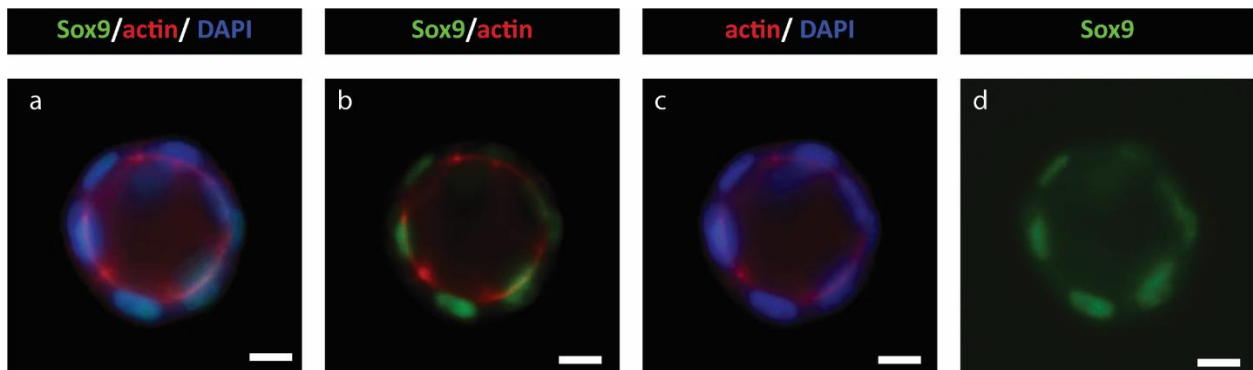

**Supplementary figure 5. Immunohistochemistry images of SOX9 in 3D structures of chicken intestinal organoids** Processed 2 days after seeding. Progenitor cells are visualized with anti-Sox9. **a.** Sox9/actin and DAPI staining **b.** Sox9/actin staining **c.** actin/ DAPI staining **d.** Sox9 staining. Scale bar: 400  $\mu$ m.
